# Supplementary material
Source: PubMed Central journal article supplement (PMC6345160)
Supplement: NIHMS1506696-supplement-11.pdf [file NIHMS1506696-supplement-11.pdf]

**Supplementary Figure 1**

Quantification of brown adipose tissue in regions of interest (green outline) in images obtained with positron-emission tomography (PET) (A) and CT (B).

**Supplementary Figure 2**

Quantification of abdominal total adipose tissue (A), visceral adipose tissue (B), subcutaneous adipose tissue (C), and paraspinal muscle (D) on axial non-contrast CT using semiautomated methods.
